# Supplementary material for: One-day outpatient health management prevents hazardous events during fetal childbirth of gestational diabetes mellitus
Source: Research Square preprint supplement (doi:10.21203/rs.3.rs-838615/v1), 2021-08-26
Supplement: Supplementary file 2 [file 31a5d84d58dee38d2571557b.xlsx]

## Sheet: Table 1
Table 1 Standard process
Time Course	Detailed steps
07:30:00	Venous blood for fasting was extracted to measure blood lipid, glycated hemoglobin, coagulation function, fasting blood glucose. Pregnant women were guided to use a glucose meter in fingertips and correct whether the glucose meter operated normally;
8:00-9:00	Go to the nutrition canteen of our hospital for breakfast (standardized meal: buns 80g+ sugar-free soybean milk 150g+ egg 50-60g), then return to the one-day clinic after breakfast;
9:00-9:50	Lecture 1: What is diabetes?
9:50-10:20	Nurse leads the pregnant women to exercise (muscle relaxation training, etc.);
10:20-10:30	Nurses guide pregnant women to measure blood glucose 2 hours after breakfast, and then the pregnant women have extra meal (delivered to the one-day clinic by the nutrition canteen of our hospital, 100g of plain yoghurt);
10:40-11:40	Lecture 2: Diet treatment for diabetes;
11:40-12:00	Blood glucose 30 minutes before lunch was measured.
12:00-12:30	Eating Chinese food in nutrition canteen: Kung Pao Chicken (chicken 60g+ carrot 30g) + Oyolai (150g) + stewed zucchini (100g) + multigrain rice (corn 50g+ white rice 40g);
13:00-14.00	Pregnant women go for a brisk walk outdoors (six-step method), and then return to the one-day clinic for rest;
14:00-14:40	Lecture 3: Mental relaxation guidance during pregnancy;
14:30:00	Blood glucose 2 hours after lunch was measured.
14:45-15:30	Lecture 4: Monitoring of neonates with gestational diabetes;
15:30-16:30	Lecture 5:GDM exercise guidance, blood glucose and obstetric monitoring; Additional meal (one apple 200g+ Haoyiduo fresh milk 250ml), venous blood results;
16:30-17:30	The doctor commented on the test results, the current blood glucose status, and assessed whether the blood glucose meter was normal.
16:50:00	Blood glucose was measured 30 minutes before dinner;
17:20:00	Eat dinner in the nutrition canteen: multigrain rice (corn 50g+ white rice 40g) + shredded pork (lean pork 50g) + cucumber salad (200g) + cabbage and tofu soup (tofu 80g+ cabbage 150g);
17:50:00	Go home after the meal and measure your blood glucose at 7pm and 12pm.
The second and trird days	Implement a one-day outpatient similar diet and exercise program, exchange equal portions of food through the food exchange share method, and replace recipes on your own;Through simultaneous muscle relaxation training and six-step exercise, continuous monitoring of blood glucose;
The forth day	Bring the blood glucose monitoring results to the hospital for treatment. The contents of treatment include blood pressure measurement, weight, uterine height, abdominal circumference, fetal heart sound measurement, personalized guidance on diet, exercise and blood glucose monitoring in the future.
Note: The daily meals of the outpatient department are customized by the nutrition canteen in the hospital according to the patients with gestational diabetes mellitus.

## Sheet: Table 2
Table 2 Basic information
Factors	Attending one-day clinic program		Total (N=1393)	Chi-square	P-Value
	No（n=858）	Yes（n=535）
Age				2.46	0.1169
0-35(%)	571(66.55)	334(62.43)	905(64.97)
35-50(%)	287(33.45)	201(37.57)	488(35.03)
BMI before pregnency				10.99	0.0118
10-18.5(%)	73(8.51)	31(5.79)	104(7.47)
18.5-24(%)	531(61.89)	309(57.76)	840(60.30)
24-28(%)	199(23.19)	163(30.47)	362(25.99)
≥28(%)	55(6.41)	32(5.98)	87(6.25)
Diabetes history of father				1.02	0.3132
Yes(%)	29(3.38)	13(2.43)	42(3.02)
No(%)	829(96.62)	522(97.57)	1351(96.98)
Diabetes history of mother				0.05	0.8156
Yes(%)	7(0.82)	5(0.93)	12(0.86)
No(%)	851(99.18)	530(99.07)	1381(99.14)
PCOS				0.12	0.7307
Yes(%)	8(0.93)	6(1.12)	14(1.01)
No(%)	850(99.07)	529(98.88)	1379(98.99)
Abnormal lipid metabolism				0.11	0.7359
Yes(%)	1(0.12)	1(0.19)	2(0.14)
No(%)	857(99.88)	534(99.81)	1391(99.86)
Gynecolgical tumor				0.07	0.7979
Yes(%)	4(0.47)	2(0.37)	6(0.43)
No(%)	854(99.53)	533(99.63)	1387(99.57)
Premature birth				0.19	0.6663
Yes(%)	62(7.23)	42(7.85)	104(7.47)
No(%)	796(92.77)	493(92.15)	1289(92.53)
Macrosomia				5.11	0.0238
Yes(%)	53(6.57)	18(3.64)	71(5.45)
No(%)	754(93.43)	477(96.36)	1231(94.55)
Low birth weight infant				0.96	0.326
Yes(%)	51(6.34)	40(7.74)	91(6.88)
No(%)	754(93.66)	477(92.26)	1231(93.12)

## Sheet: Table 3
Table 3 Statistical result of premature birth.
Factors	Premature birth		Chi-square	P-Value
	Yes	No
	(N=104)	(N=1289)
Age	33.05(4.22)	33.06(4.87)	0.54	0.4632
0-35(%)	71(68.27)	834(64.70)
35-50(%)	33(31.73)	455(35.30)
BMI before pregnency	22.83(3.35)	22.78(3.17)	0.76	0.8585
10-18.5(%)	9(8.65)	95(7.37)
18.5-24(%)	62(59.62)	778(60.36)
24-28(%)	25(24.04)	337(26.14)
≥28(%)	8(7.69)	79(6.13)
Diabetes history of father			0.46	0.4984
Yes(%)	2(1.92)	40(3.10)
No(%)	102(98.08)	1249(96.90)
Diabetes history of mother			0.01	0.9086
Yes(%)	1(0.96)	11(0.85)
No(%)	103(99.04)	1278(99.15)
PCOS			0	0.9631
Yes(%)	1(0.96)	13(1.01)
No(%)	103(99.04)	1276(98.99)
Abnormal lipid metabolism			0.16	0.6877
Yes(%)	0(0.00)	2(0.16)
No(%)	104(100.0)	1287(99.84)
Gynecolgical tumor			0.49	0.4856
Yes(%)	0(0.00)	6(0.47)
No(%)	104(100.0)	1283(99.53)
Attending one-day clinic program			0.19	0.6663
Yes(%)	42(40.38)	493(38.25)
No(%)	62(59.62)	796(61.75)

## Sheet: Table 4
Table 4 Statistical result of neonatal birth weight.
Factors	Neonatal birth weight			Low-birth weight		Macrosomia
	Normal	Low-birth weight	Macrosomia	Chi-square	P-Value	Chi-square	P-Value	Total
	(N=1231)	(N=91)	(N=71)					(N=1393)
Age	32.97(4.84)	33.19(4.78)	34.41(4.41)	0	0.9577	16.91	<.0001	33.06(4.83)
0-35(%)	815(66.21)	60(65.93)	30(42.25)					905(64.97)
35-50(%)	416(33.79)	31(34.07)	41(57.75)					488(35.03)
BMI before pregnency	22.75(3.23)	22.57(2.85)	23.67(2.58)	1.5	0.682	9.03	0.0289	22.78(3.18)
10-18.5(%)	97(7.88)	7(7.69)	0(0.00)					104(7.47)
18.5-24(%)	742(60.28)	57(62.64)	41(57.75)					840(60.30)
24-28(%)	312(25.35)	24(26.37)	26(36.62)					362(25.99)
≥28(%)	80(6.50)	3(3.30)	4(5.63)					87(6.25)
Diabetes history of father				1.3	0.2535	0.75	0.3878
Yes(%)	40(3.25)	1(1.10)	1(1.41)					42(3.02)
No(%)	1191(96.75)	90(98.90)	70(98.59)					1351(96.98)
Diabetes history of mother				0.9	0.3441	0.7	0.4033
Yes(%)	12(0.97)	0(0.00)	0(0.00)					12(0.86)
No(%)	1219(99.03)	91(100.0)	71(100.0)					1381(99.14)
PCOS				1.05	0.3064	0.82	0.3663
Yes(%)	14(1.14)	0(0.00)	0(0.00)					14(1.01)
No(%)	1217(98.86)	91(100.0)	71(100.0)					1379(98.99)
Abnormal lipid metabolism				0.15	0.7004	0.12	0.7339
Yes(%)	2(0.16)	0(0.00)	0(0.00)					2(0.14)
No(%)	1229(99.84)	91(100.0)	71(100.0)					1391(99.86)
Gynecolgical tumor				0.45	0.5044	0.35	0.5554
Yes(%)	6(0.49)	0(0.00)	0(0.00)					6(0.43)
No(%)	1225(99.51)	91(100.0)	71(100.0)					1387(99.57)
Attending one-day clinic program				0.96	0.326	5.11	0.0238
Yes(%)	477(38.75)	40(43.96)	18(25.35)					535(38.41)
No(%)	754(61.25)	51(56.04)	53(74.65)					858(61.59)

## Sheet: Table 5
Table 5 The preventive effect for premuture birth.
Factors	Groups	Single-factor regression analysis		Multi-factor regression analysis
		P	OR(95%CI)	P	OR(95%CI)
Age	0-35	ref
	35-50	0.464	0.852(0.555,1.308)	0.475	0.854(0.553,1.317)
BMI before pregnency	10-18.5	0.643	1.189(0.572,2.469)	0.692	1.161(0.555,2.427)
	18.5-24	ref
	24-28	0.771	0.931(0.575,1.507)	0.75	0.924(0.569,1.5)
	≥28	0.543	1.271(0.587,2.75)	0.539	1.274(0.588,2.763)
Diabetes history of father	Yes(%)	0.503	0.612(0.146,2.57)	0.515	0.618(0.145,2.632)
	No(%)	ref
Diabetes history of mother	Yes(%)	0.909	1.128(0.144,8.823)	0.846	1.229(0.153,9.867)
	No(%)	ref
PCOS	Yes(%)	0.964	0.954(0.124,7.358)	0.963	0.953(0.122,7.44)
	No(%)	ref
Attending one-day clinic program	Yes(%)	0.666	1.094(0.728,1.644)	0.635	1.104(0.733,1.664)
	No(%)	ref
Note: Multivariate analysis adjusted for age, pre-pregnancy BMI, family history of diabetes, and one-day outpatient visit after PCOS on preterm delivery.

## Sheet: Table 6
Table 6 The preventive effect for premuture birth.
Factors	Groups	Single-factor regression analysis		Multi-factor regression analysis
		P	OR(95%CI)	P	OR(95%CI)
Age	0-35	ref
	35-50	<0.0001	2.678(1.648,4.351)	<0.0001	2.464(1.508,4.026)
BMI before pregnency	10-18.5		——		——
	18.5-24	ref
	24-28	0.114	1.508(0.907,2.509)	0.144	1.471(0.876,2.469)
	≥28	0.852	0.905(0.316,2.592)	0.773	0.855(0.295,2.476)
Diabetes history of father	Yes(%)	0.402	0.426(0.058,3.14)	0.323	0.362(0.048,2.713)
	No(%)	ref
Attending one-day clinic program	Yes(%)	0.026	0.537(0.311,0.928)	0.008	0.474(0.272,0.826)
	No(%)	ref
Note: multivariate analysis adjusted for age, pre-pregnancy BMI, and a family history of diabetes mellitus on the effect of one-day clinic service on low birth weight infants.

## Sheet: Table 7
Table 7 The preventive effect for Low-birth weight.
Factors	Groups	Single-factor regression analysis		Multi-factor regression analysis
		P	OR(95%CI)	P	OR(95%CI)
Age	0-35	ref
	35-50	0.958	1.012(0.646,1.586)	0.991	1.003(0.636,1.581)
BMI before pregnency	10-18.5	0.88	0.939(0.417,2.118)	0.9	1.054(0.464,2.393)
	18.5-24	ref
	24-28	0.996	1.001(0.61,1.643)	0.908	1.03(0.626,1.694)
	≥28	0.235	0.488(0.149,1.595)	0.235	2.051(0.627,6.71)
Diabetes history of father	是	0.277	0.331(0.045,2.434)	0.273	3.062(0.415,22.605)
	否	ref
Attending one-day clinic program	是	0.327	1.24(0.807,1.905)	0.384	0.825(0.535,1.272)
	否	ref
Note: multivariate analysis adjusted for age, pre-pregnancy BMI, and a family history of diabetes mellitus on the effect of one-day clinic service on low birth weight infants.
